# Supplementary material for: Immunotherapy in Hepatocellular Cancer Patients with Mild to Severe Liver Dysfunction: Adjunctive Role of the ALBI Grade
Source: PubMed Central journal article supplement (PMC7408648; doi:10.3390/cancers12071862), 2020-07-10
Supplement: cancers-12-01862-s001.pdf [file cancers-12-01862-s001.pdf]

Supplementary Materials

## Immunotherapy in Hepatocellular Cancer Patients with Mild to Severe Liver Dysfunction: Adjunctive Role of the ALBI Grade

David J. Pinato, Takahiro Kaneko, Anwaar Saeed, Tiziana Pressiani, Ahmed Kaseb, Yinghong Wang, David Szafron, Tomi Jun, Sirish Dharmapuri, Abdul Rafeh Naqash, Mahvish Muzaffar, Musharraf Navaid, Chieh-Ju Lee, Anushi Bulumulle, Bo Yu, Sonal Paul, Neil Nimkar, Dominik Bettinger, Hannah Hildebrand, Yehia I. Abugabal, Celina Ang, Thomas U. Marron, Uqba Khan, Nicola Personeni, Lorenza Rimassa and Yi-Hsiang Huang

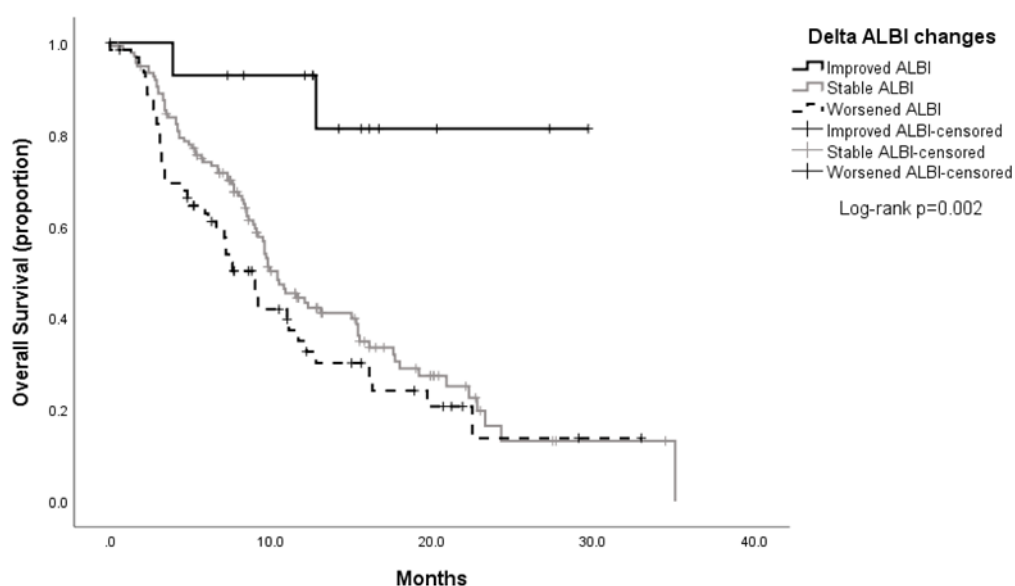

**Figure S1.** Dynamic changes in the ALBI grade from ICI commencement to discontinuation associated with improved OS in HCC patients.

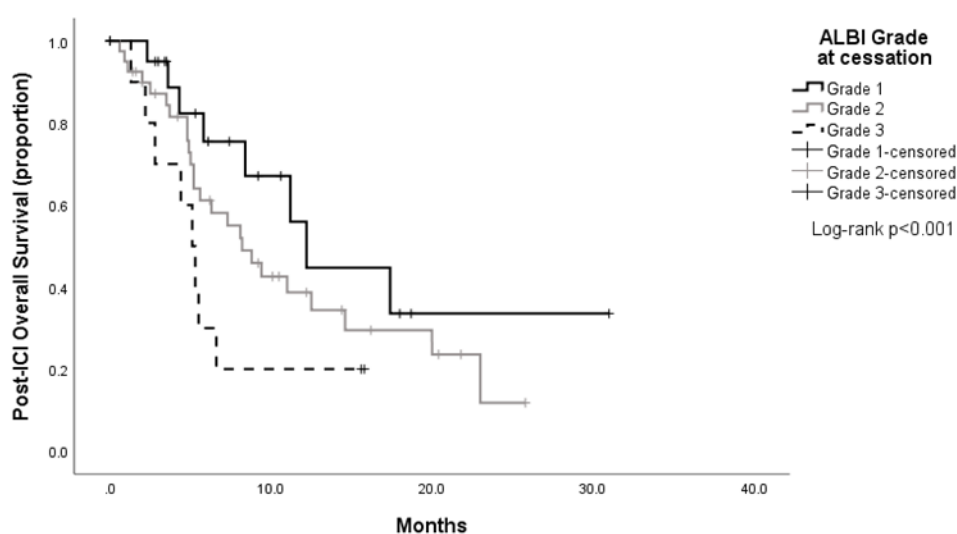

**Figure S2.** The relationship between ALBI grade at discontinuation and PIOS within patients in CTP A functional class at ICI discontinuation.

**Table S1.** Distribution of Treatment-related adverse events (trAEs) according to Child Turcotte-Pugh (CTP) classification.

| trAE Class                   | trAE of Any Grade |         |         |
|------------------------------|-------------------|---------|---------|
|                              | CTP A             | CTP B   | CTP C   |
| <b>Dermatologic Toxicity</b> | 32 (10)           | 6 (2)   | 1 (0.3) |
| <b>Diarrhoea/Colitis</b>     | 23 (7)            | 2 (0.5) | 0 (0)   |
| <b>Fatigue</b>               | 47 (14)           | 10 (3)  | 0 (0)   |
| <b>Liver Toxicity</b>        | 53 (16)           | 6 (2)   | 0 (0)   |
| <b>Endocrine Toxicity</b>    | 20 (6)            | 2 (0.5) | 0 (0)   |
| <b>Pneumotoxicity</b>        | 12 (4)            | 1 (0.3) | 0 (0)   |
| <b>Others</b>                | 38 (12)           | 2 (0.5) | 1 (0.3) |

**Table S2.** Distribution of Treatment-related adverse events (trAEs) according to Albumin-bilirubin (ALBI) grade.

| trAE Class                   | trAE of Any Grade |        |         |
|------------------------------|-------------------|--------|---------|
|                              | ALBI 1            | ALBI 2 | ALBI 3  |
| <b>Dermatologic Toxicity</b> | 19 (6)            | 12 (4) | 5 (0.3) |
| <b>Diarrhoea/Colitis</b>     | 13 (4)            | 11 (3) | 0 (0.3) |
| <b>Fatigue</b>               | 23 (7)            | 25 (7) | 3 (0.3) |
| <b>Liver toxicity</b>        | 27 (8)            | 31 (9) | 1 (0.3) |
| <b>Endocrine toxicity</b>    | 10 (3)            | 11 (3) | 0 (0.3) |
| <b>Pneumotoxicity</b>        | 6 (2)             | 6 (2)  | 1 (0.3) |
| <b>Others</b>                | 33 (10)           | 18 (5) | 1 (0.3) |

**Table S3.** The relationship between CTP class and trAEs in patients treated with ICI as monotherapy or combinations.

| ICPI Regimen        | Child-Turcotte Pugh Class | No TrAE | TrAE Any grade | Total | Pearson X <sup>2</sup> (p Value) |
|---------------------|---------------------------|---------|----------------|-------|----------------------------------|
| Monotherapy         | CTP A                     | N       | 99             | 75    | 174                              |
|                     |                           | %       | 57%            | 43%   | 100%                             |
|                     | CTP B                     | N       | 40             | 21    | 61                               |
|                     |                           | %       | 66%            | 34%   | 100%                             |
|                     | CTP C                     | N       | 5              | 2     | 7                                |
| %                   | 72%                       | 28%     | 100%           |       |                                  |
| Total               | N                         | 144     | 98             | 242   |                                  |
| %                   | 60%                       | 40%     | 100%           |       |                                  |
| Combination Therapy | CTP A                     | N       | 12             | 36    | 48                               |
|                     |                           | %       | 25%            | 75%   | 100%                             |
|                     | CTP B                     | N       | 2              | 1     | 3                                |
|                     |                           | %       | 66%            | 34%   | 100%                             |
| Total               | N                         | 14      | 37             | 51    |                                  |
| %                   | 2%                        | 72%     | 100%           |       |                                  |
| Total               | CTP A                     | N       | 111            | 111   | 222                              |
|                     |                           | %       | 50%            | 50%   | 100%                             |
|                     | CTP B                     | N       | 42             | 22    | 64                               |
|                     |                           | %       | 66%            | 34%   | 100%                             |
|                     | CTP C                     | N       | 5              | 2     | 7                                |
| %                   | 71%                       | 29%     | 100%           |       |                                  |
| Total               | N                         | 158     | 135            | 293   |                                  |
| %                   | 54%                       | 46%     | 100%           |       |                                  |

**Table S4.** The relationship between ALBI grade and trAEs in patients treated with ICI as monotherapy or combinations.

| ICPI Regimen                   | ALBI Grade | No<br>TrAE     | TrAE<br>Any grade | Total       | Pearson X <sup>2</sup><br>( <i>p</i> Value) |
|--------------------------------|------------|----------------|-------------------|-------------|---------------------------------------------|
| <b>Monotherapy</b>             | ALBI 1     | N 35<br>% 51%  | 34<br>49%         | 69<br>100%  | 4.11<br>( <i>p</i> = 0.12)                  |
|                                | ALBI 2     | N 86<br>% 61%  | 54<br>39%         | 140<br>100% |                                             |
|                                | ALBI 3     | N 22<br>% 71%  | 9<br>29%          | 31<br>100%  |                                             |
|                                | Total      | N 143<br>% 60% | 97<br>40%         | 240<br>100% |                                             |
| <b>Combination<br/>Therapy</b> | ALBI 1     | N 6<br>% 24%   | 19<br>76%         | 25<br>100%  | 0.67<br>( <i>p</i> = 0.41)                  |
|                                | ALBI 2     | N 8<br>% 35%   | 15<br>65%         | 23<br>100%  |                                             |
|                                | Total      | N 14<br>% 30%  | 34<br>70%         | 48<br>100%  |                                             |
| <b>Total</b>                   | ALBI 1     | N 41<br>% 44%  | 53<br>56%         | 94<br>100%  | 8.54<br>( <i>p</i> = 0.01)                  |
|                                | ALBI 2     | N 94<br>% 58%  | 69<br>42%         | 163<br>100% |                                             |
|                                | ALBI 3     | N 22<br>% 71%  | 9<br>29%          | 31<br>100%  |                                             |
|                                | Total      | N 157<br>% 54% | 131<br>46%        | 288<br>100% |                                             |

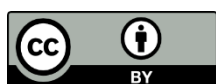

© 2020 by the authors. Licensee MDPI, Basel, Switzerland. This article is an open access article distributed under the terms and conditions of the Creative Commons Attribution (CC BY) license (<http://creativecommons.org/licenses/by/4.0/>).
